# Supplementary material for: Deciphering the Potential of Pre and Pro-Vitamin D of Mushrooms against Mpro and PLpro Proteases of COVID-19: An In Silico Approach
Source: MDPI journal article supplement (doi:10.3390/molecules27175620), 2022-08-31
Supplement: s1 [file s1]

## **Supplementary Material**

# **Deciphering the Potential of Pre and Pro-Vitamin D of Mushrooms against Mpro and PLpro Proteases of COVID-19: An In Silico Approach**

**Abhay Tiwari <sup>1,\*</sup>, Garima Singh <sup>1</sup>, Gourav Choudhir <sup>1</sup>, Mohit Motiwale <sup>2</sup>, Nidhi Joshi <sup>3</sup>,  
Vasudha Sharma <sup>4,\*</sup>, Rupesh K. Srivastava <sup>5</sup>, Satyawati Sharma <sup>1,\*</sup>, Marco Tutone <sup>6,\*</sup>  
and Pradeep Kumar Singour <sup>2</sup>**

<sup>1</sup> Centre for Rural Development & Technology, Indian Institute of Technology (IIT),  
New Delhi 110016, India

<sup>2</sup> Computational and Synthetic Chemistry Lab, Department of Pharmaceutical Chemistry,  
Faculty of Pharmacy, VNS Group of Institutions, Bhopal 462044, India

<sup>3</sup> Department of Pharmacology, University of Minnesota, Minneapolis, MN 55455, USA

<sup>4</sup> Department of Food Technology, Jamia Hamdard, New Delhi 110062, India

<sup>5</sup> Department of Biotechnology, All India Institute of Medical Sciences (AIIMS),  
New Delhi 110029, India

<sup>6</sup> Dipartimento di Scienze e Tecnologie Biologiche Chimiche e Farmaceutiche, Università  
degli Studi di Palermo, 90123 Palermo, Italy

\* Correspondence: tiwariabhay.19@gmail.com (A.T.); kotpalvasudha@gmail.com or  
vasudhakatwal@gma (V.S.); satyawatis@hotmail.com or ssharma@rdat.iitd.ac.in (S.S.);  
marco.tutone@unipa.it (M.T.)

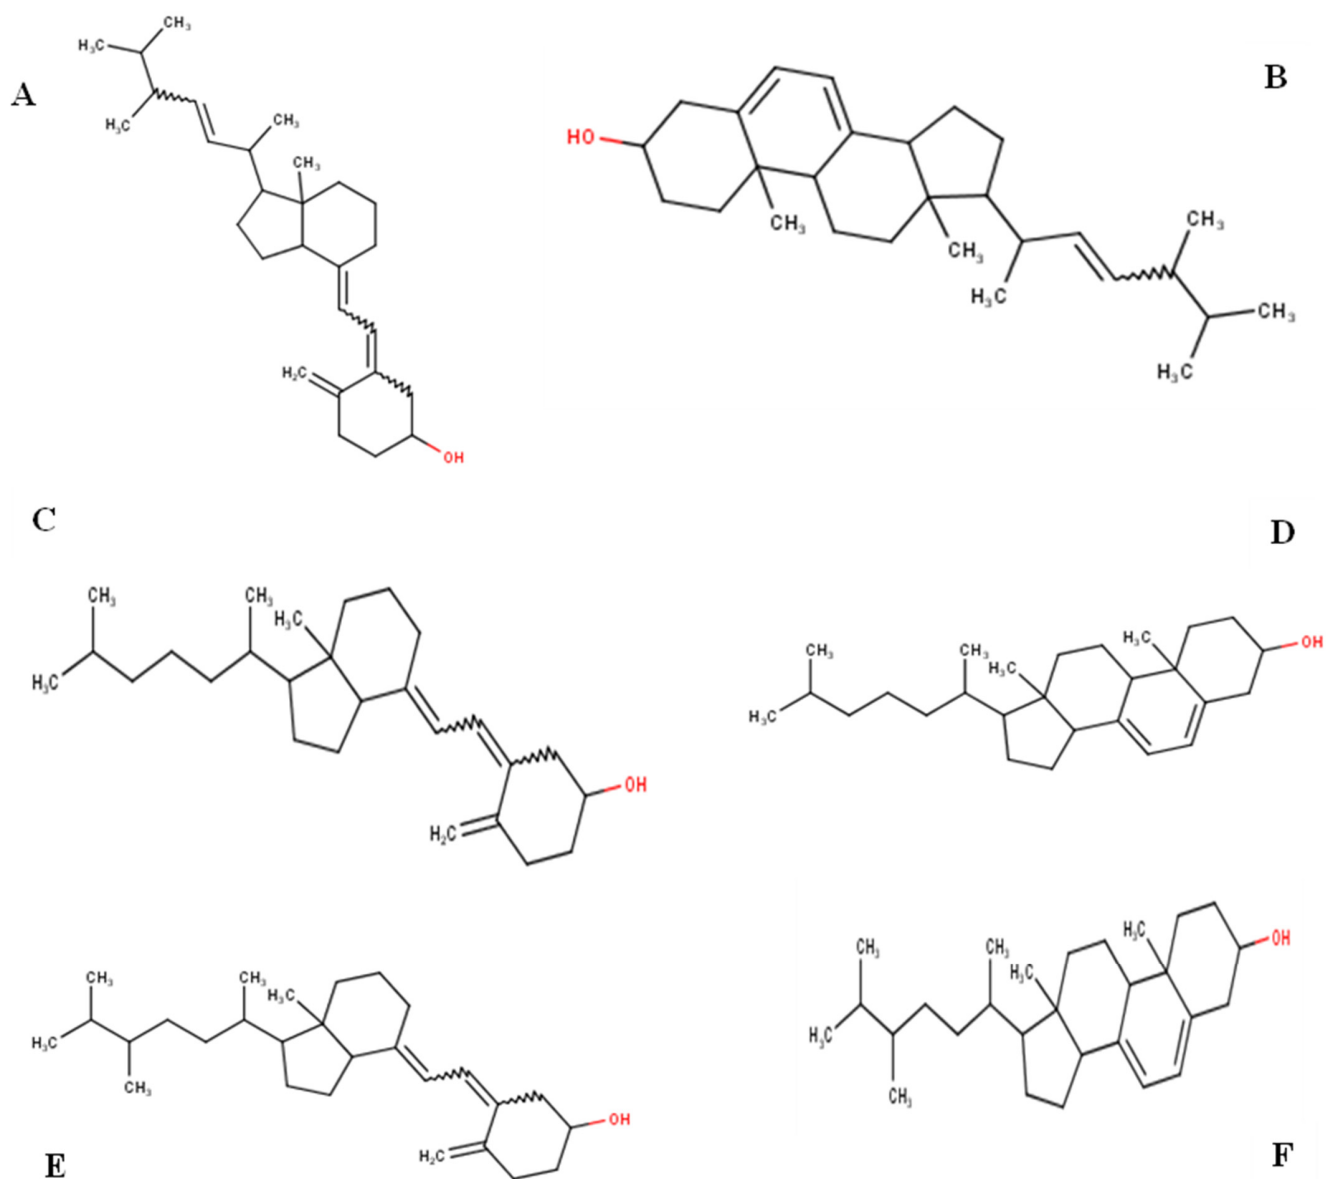

**Supplementary Figure S1:** 2D structures of pre-and pro-vitamin Ds molecules (**A**) Ergocalciferol (pre-vitamin-D<sub>2</sub>) (**B**) Ergosterol (pro-vitamin-D<sub>2</sub>) (**C**) Cholecalciferol (pre-vitamin-D<sub>3</sub>) (**D**) 7-Dehydrocholesterol (pro-vitamin-D<sub>3</sub>) (**E**) 22,23-dihydroergocalciferol (pre-vitamin-D<sub>4</sub>) (**F**) 22,23-Dihydroergosterol (pro-vitamin-D<sub>4</sub>)

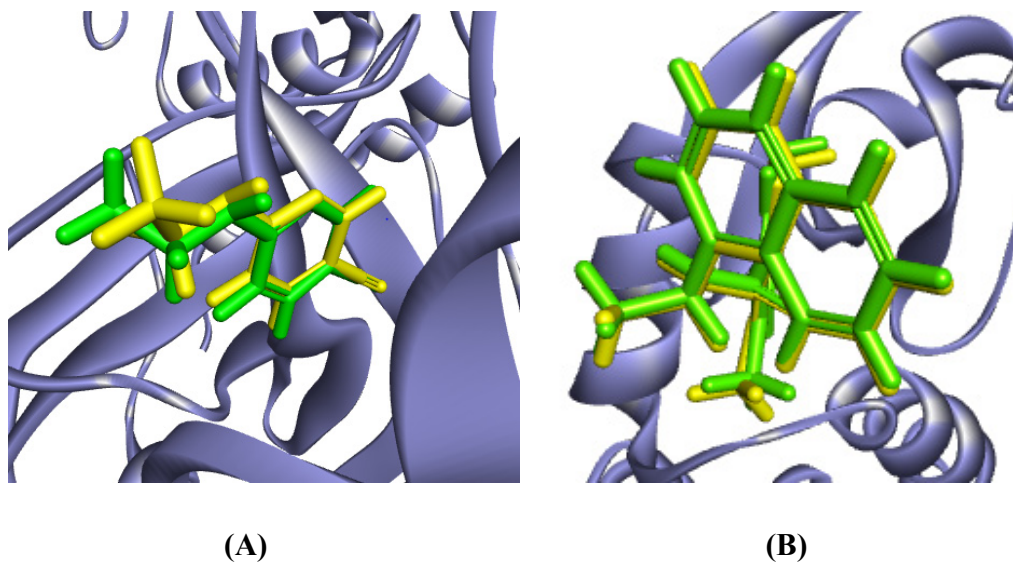

**Supplementary Figure S2:** Result of re-docking experiments green colored pose represents original conformation and yellow color represents docked conformation of co-crystallized ligand (A) 6-(ethylamino)pyridine-3-carbonitrile (RZS) of Mpro and (B) 5-amino-2-methyl-N-[(1R)-1-naphthalen-1-ylethyl]benzamide (TTT) for PLpro.
